# Supplementary material for: Changes in Indocyanine Green Lymphography Patterns after Physical Treatment in Secondary Upper Limb Lymphedema
Source: PubMed Central journal article supplement (PMC7073737; doi:10.3390/jcm9020306), 2020-01-22
Supplement: jcm-09-00306-s001.pdf [file jcm-09-00306-s001.pdf]

**Supplementary Table 1.** Evolution of the ICG pattern in the anterior (ANT) and posterior (POST) regions of the hand and wrist at baseline (B) and after the Physiotherapy (A) treatment, in the 10 subjects under study.

| ID | PALM OF HAND |   |                 | BACK OF HAND |   |                 | ANTERIOR WRIST |   |                 | POSTERIOR WRIST |   |                 |
|----|--------------|---|-----------------|--------------|---|-----------------|----------------|---|-----------------|-----------------|---|-----------------|
|    | B            | A | EV <sup>1</sup> | B            | A | EV <sup>1</sup> | B              | A | EV <sup>1</sup> | B               | A | EV <sup>1</sup> |
| 1  | 0            | 0 | RU              | 1            | 1 | RU              | 0              | 0 | RU              | 1               | 1 | RU              |
| 2  | 0            | 0 | RU              | 1            | 1 | RU              | 0              | 0 | RU              | 1               | 1 | RU              |
| 3  | 0            | 1 | NVa             | 1            | 1 | RU              | 0              | 1 | NVa             | 1               | 1 | RU              |
| 4  | 0            | 0 | RU              | 1            | 1 | RU              | 1              | 0 | NVa             | 1               | 1 | RU              |
| 5  | 1            | 1 | RU              | 4            | 1 | I               | 4              | 1 | I               | 4               | 2 | I               |
| 6  | 0            | 0 | RU              | 1            | 1 | RU              | 4              | 1 | I               | 1               | 1 | RU              |
| 7  | 4            | 3 | I               | 4            | 4 | RU              | 3              | 3 | RU              | 4               | 2 | I               |
| 8  | 0            | 0 | RU              | 4            | 1 | I               | 4              | 4 | RU              | 4               | 2 | I               |
| 9  | 0            | 0 | RU              | 1            | 1 | RU              | 4              | 1 | I               | 1               | 1 | RU              |
| 10 | 4            | 0 | NVa             | 3            | 1 | I               | 4              | 2 | I               | 2               | 3 | W               |

(0) Not observed, (1) linear pattern, (2) splash pattern, (3) stardust pattern, (4) diffuse pattern; EV<sup>1</sup>: Evolution of the pattern.. RU: remained unchanged., NVa: Not valuable, I: improved, P: worsened. .

**Supplementary Table 2.** Evolution of the ICG pattern in the anterior (ANT) and posterior (POST) regions of the forearm (at 4, 8, 12 and 16 cm of the wrist) at baseline (B) and after Physiotherapy treatment (A) in the ten subjects studied.

| BD | To 4 cm of the wrist.<br>Ant |   |                 | To 4 cm of the wrist...<br>Post. |   |                 | To 8 cm of the wrist.<br>Ant. |   |                 | To 8 cm of the wrist.<br>Post. |   |                 | To 12 cm of the wrist.<br>Ant. |   |                 | To 12 cm of the wrist...<br>Post. |   |                 | To 16 cm of the wrist.<br>Ant. |   |                 | To 16 cm of the wrist.<br>Post. |   |                 |
|----|------------------------------|---|-----------------|----------------------------------|---|-----------------|-------------------------------|---|-----------------|--------------------------------|---|-----------------|--------------------------------|---|-----------------|-----------------------------------|---|-----------------|--------------------------------|---|-----------------|---------------------------------|---|-----------------|
|    | B                            | A | EV <sup>1</sup> | B                                | A | EV <sup>1</sup> | B                             | A | EV <sup>1</sup> | B                              | A | EV <sup>1</sup> | B                              | A | EV <sup>1</sup> | B                                 | A | EV <sup>1</sup> | B                              | A | EV <sup>1</sup> | B                               | A | EV <sup>1</sup> |
| 1  | 0                            | 0 | RU              | 2                                | 0 | NVa             | 4                             | 0 | NVa             | 4                              | 0 | NVa             | 2                              | 0 | NVa             | 4                                 | 0 | NVa             | 2                              | 0 | NVa             | 2                               | 0 | NVa             |
| 2  | 0                            | 1 | NVa             | 1                                | 1 | RU              | 0                             | 0 | RU              | 1                              | 0 | NVa             | 0                              | 0 | RU              | 1                                 | 0 | NVa             | 4                              | 0 | NVa             | 4                               | 0 | NVa             |
| 3  | 0                            | 1 | NVa             | 4                                | 1 | I               | 4                             | 1 | I               | 1                              | 1 | RU              | 4                              | 1 | I               | 1                                 | 1 | RU              | 2                              | 1 | I               | 1                               | 1 | RU              |
| 4  | 4                            | 4 | RU              | 3                                | 1 | I               | 2                             | 4 | W               | 3                              | 3 | RU              | 2                              | 4 | W               | 2                                 | 1 | I               | 2                              | 3 | W               | 2                               | 1 | I               |
| 5  | 3                            | 4 | W               | 4                                | 2 | I               | 3                             | 4 | W               | 3                              | 2 | I               | 3                              | 2 | I               | 3                                 | 4 | W               | 3                              | 4 | W               | 3                               | 4 | W               |
| 6  | 0                            | 1 | NVa             | 1                                | 1 | RU              | 3                             | 3 | RU              | 3                              | 1 | I               | 3                              | 3 | RU              | 3                                 | 1 | M               | 0                              | 2 | NVa             | 3                               | 1 | I               |
| 7  | 3                            | 3 | RU              | 4                                | 2 | I               | 3                             | 3 | RU              | 4                              | 2 | I               | 3                              | 2 | M               | 2                                 | 2 | RU              | 3                              | 2 | MI              | 2                               | 0 | NVa             |
| 8  | 4                            | 4 | RU              | 2                                | 2 | RU              | 2                             | 4 | W               | 2                              | 2 | RU              | 2                              | 2 | RU              | 2                                 | 2 | RU              | 1                              | 2 | W               | 1                               | 2 | W               |
| 9  | 2                            | 2 | RU              | 1                                | 1 | RU              | 2                             | 2 | RU              | 2                              | 2 | RU              | 4                              | 2 | I               | 1                                 | 1 | RU              | 1                              | 1 | RU              | 1                               | 1 | RU              |
| 10 | 3                            | 2 | I               | 4                                | 4 | RU              | 1                             | 0 | NVa             | 2                              | 0 | NVa             | 0                              | 1 | NVa             | 0                                 | 2 | NVa             | 2                              | 1 | I               | 0                               | 0 | RU              |

(0) Not observed pattern, (1) linear pattern, (2) splash pattern, (3) stardust pattern, (4) diffuse pattern; EV<sup>1</sup>: Evolution of the pattern.. RU: remained unchanged., NVa: Not valuable, I: improved, P: worsened.

**Supplementary Table 3.** Evolution of the ICG pattern in the anterior (ANT) and posterior (POST) regions of the elbow to the amrpit (at 4, 8,12 and 16 cm. over the elbow) at baseline (B) and after the Physiotherapy treatment (A) in the ten subjects studied.

| ID | Elbow Ant. |   |                 | Elbow Post. |   |                 | To 4 cm over elbow Ant |   |                 | To 4 cm over elbow Post. |   |                 | To 8 cm over elbow Ant. |   |                 | To 8 over elbow Post. |   |                 | To 12 cm over elbow Ant. |   |                 | To 12 cm over elbow Post. |   |                 | To 16 cm over elbow Ant. |   |                 | To 16 cm over elbow Post. |   |                 |
|----|------------|---|-----------------|-------------|---|-----------------|------------------------|---|-----------------|--------------------------|---|-----------------|-------------------------|---|-----------------|-----------------------|---|-----------------|--------------------------|---|-----------------|---------------------------|---|-----------------|--------------------------|---|-----------------|---------------------------|---|-----------------|
|    | B          | A | EV <sup>1</sup> | B           | A | EV <sup>1</sup> | B                      | A | EV <sup>1</sup> | B                        | A | EV <sup>1</sup> | B                       | A | EV <sup>1</sup> | B                     | A | EV <sup>1</sup> | B                        | A | EV <sup>1</sup> | B                         | A | EV <sup>1</sup> | B                        | A | EV <sup>1</sup> | B                         | A | EV <sup>1</sup> |
| 1  | 0          | 0 | RU              | 2           | 1 | I               | 3                      | 2 | M               | 2                        | 2 | RU              | 3                       | 2 | I               | 2                     | 2 | RU              | 3                        | 2 | M               | 4                         | 2 | I               | 4                        | 0 | NVa             | 4                         | 2 | I               |
| 2  | 2          | 2 | RU              | 4           | 4 | RU              | 2                      | 2 | RU              | 2                        | 2 | RU              | 2                       | 2 | RU              | 2                     | 2 | RU              | 2                        | 2 | RU              | 2                         | 0 | NVa             | 2                        | 2 | RU              | 2                         | 0 | NVa             |
| 3  | 1          | 1 | RU              | 4           | 2 | I               | 1                      | 1 | RU              | 1                        | 1 | RU              | 2                       | 1 | I               | 1                     | 1 | RU              | 1                        | 1 | RU              | 2                         | 1 | I               | 1                        | 1 | RU              | 2                         | 1 | I               |
| 4  | 2          | 1 | I               | 2           | 1 | I               | 2                      | 2 | RU              | 3                        | 1 | I               | 3                       | 2 | I               | 3                     | 2 | I               | 3                        | 0 | NVa             | 3                         | 2 | I               | 3                        | 0 | NVa             | 2                         | 2 | RU              |
| 5  | 0          | 4 | NVa             | 3           | 3 | RU              | 2                      | 4 | W               | 3                        | 3 | RU              | 2                       | 4 | W               | 3                     | 4 | W               | 2                        | 0 | NVa             | 4                         | 0 | NVa             | 0                        | 0 | RU              | 0                         | 0 | RU              |
| 6  | 1          | 1 | RU              | 0           | 0 | RU              | 3                      | 2 | M               | 0                        | 2 | NVa             | 3                       | 2 | I               | 0                     | 0 | RU              | 3                        | 3 | RU              | 0                         | 0 | RU              | 3                        | 3 | RU              | 0                         | 0 | RU              |
| 7  | 1          | 0 | NVa             | 2           | 1 | I               | 1                      | 0 | NVa             | 0                        | 4 | NVa             | 1                       | 0 | NVa             | 0                     | 0 | RU              | 1                        | 0 | NVa             | 0                         | 0 | RU              | 1                        | 0 | NVa             | 0                         | 0 | RU              |
| 8  | 4          | 0 | NVa             | 4           | 2 | I               | 0                      | 0 | RU              | 3                        | 2 | I               | 4                       | 0 | NVa             | 4                     | 2 | I               | 4                        | 0 | NVa             | 4                         | 2 | I               | 4                        | 0 | NVa             | 0                         | 0 | RU              |
| 9  | 1          | 1 | RU              | 2           | 1 | I               | 1                      | 0 | NVa             | 4                        | 1 | I               | 1                       | 0 | NVa             | 0                     | 0 | RU              | 0                        | 0 | RU              | 0                         | 0 | RU              | 0                        | 0 | RU              | 0                         | 0 | RU              |
| 10 | 2          | 2 | RU              | 4           | 4 | RU              | 2                      | 2 | RU              | 2                        | 2 | RU              | 0                       | 0 | RU              | 0                     | 2 | NVa             | 0                        | 0 | RU              | 4                         | 2 | I               | 0                        | 0 | RU              | 4                         | 4 | RU              |

(0) Not observed, (1) linear pattern, (2) splash pattern, (3) stardust pattern, (4) diffuse pattern; EV1: Evolution of the pattern.. RU: remained unchanged., NVa: Not valuable, I: improved, P: worsened.

**Supplementary Table 4.** Results in absolute frequencies of the changes of ICG pattern in the body regions assessed, after the Physiotherapy treatment.

|                                      |                            | ABSOLUTES FRECUENCIES OF THE CHANGES IN THE PATTERNS |        |        |        |        |        |           |        |        |        |   |
|--------------------------------------|----------------------------|------------------------------------------------------|--------|--------|--------|--------|--------|-----------|--------|--------|--------|---|
|                                      |                            | IMPROVED                                             |        |        |        |        |        | WORSENERD |        |        |        |   |
| BODY REGION                          |                            | 4 to 3                                               | 4 to 2 | 4 to 1 | 3 to 2 | 3 to 1 | 2 to 1 | 3 to 4    | 2 to 4 | 2 to 3 | 1 to 2 |   |
| HAND                                 | PALM                       | 1                                                    |        |        |        |        |        |           |        |        |        |   |
|                                      | BACK                       |                                                      |        | 2      |        | 1      |        |           |        |        |        |   |
| WRIST                                | ANT                        |                                                      | 1      | 3      |        |        |        |           |        |        |        |   |
|                                      | POST                       |                                                      | 3      |        |        |        |        |           |        | 1      |        |   |
| FOERARM                              | To 4 cm. over the wrist    | ANT.                                                 |        |        | 1      |        |        | 1         |        |        |        |   |
|                                      |                            | POST.                                                |        | 2      | 1      |        | 1      |           |        |        |        |   |
|                                      | To 8 cm. over the wrist.   | ANT.                                                 |        |        | 1      |        |        |           | 1      | 2      |        |   |
|                                      |                            | POST.                                                |        | 1      |        | 1      | 1      |           |        |        |        |   |
|                                      | To 12 cm. over the wrist . | ANT.                                                 |        | 1      | 1      | 2      |        |           |        | 1      |        |   |
|                                      |                            | POST.                                                |        |        |        |        | 1      | 1         | 1      |        |        |   |
|                                      | To 16 cm. over the wrist.  | ANT.                                                 |        |        |        | 1      |        | 2         | 1      |        | 1      | 1 |
|                                      |                            | POST.                                                |        |        |        |        | 1      | 1         | 1      |        |        | 1 |
|                                      | ELBOW                      | ANT.                                                 |        |        |        |        |        | 1         |        |        |        |   |
|                                      |                            | POST.                                                |        | 2      |        |        |        | 4         |        |        |        |   |
|                                      | ARM                        | To 4 cm. over elbow.                                 | ANT.   |        |        | 2      |        |           |        | 1      |        |   |
|                                      |                            |                                                      | POST.  |        |        | 1      | 1      | 1         |        |        |        |   |
| To 8 cm. over elbow.                 |                            | ANT.                                                 |        |        |        | 3      |        | 1         |        | 1      |        |   |
|                                      |                            | POST.                                                |        | 1      |        | 1      |        |           | 1      |        |        |   |
| To 12 cm. over elbow.                |                            | ANT.                                                 |        |        |        | 1      |        |           |        |        |        |   |
|                                      |                            | POST.                                                |        | 3      |        | 1      |        | 1         |        |        |        |   |
| To 16 cm. over elbow.                |                            | ANT.                                                 |        |        |        |        |        |           |        |        |        |   |
|                                      |                            | POST.                                                |        |        |        | 1      |        | 1         |        |        |        |   |
| <b>TOTAL ( ABSOLUTE FREQUENCIES)</b> |                            | 1                                                    | 14     | 9      | 15     | 6      | 12     | 6         | 5      | 2      | 2      |   |
|                                      |                            |                                                      |        |        |        |        |        |           |        |        |        |   |

(1) linear pattern, (2) splash pattern, (3) stardust pattern, (4) diffuse pattern.
